# Supplementary material for: Ultrahigh energy storage capacities in high-entropy relaxor ferroelectrics
Source: Royal Society of Chemistry journal article supplement (doi:10.1039/d4ta03637a), 2024-01-01
Supplement: d4ta03637a1.pdf [file d4ta03637a1.pdf]

## Electronic supplementary information

### Ultrahigh energy storage capacities in high-entropy relaxor ferroelectrics

Yun Yao Huang,<sup>a</sup> Kaili Shang,<sup>a</sup> Yule Yang,<sup>a</sup> Wenjing Shi,<sup>a</sup> Leiyang Zhang,<sup>a</sup> Vladimir Laletin,<sup>b</sup>

Vladimir Shur,<sup>c</sup> Ruiyi Jing,<sup>a</sup> Li Jin<sup>a,\*</sup>

<sup>a</sup>*Electronic Materials Research Laboratory, Key Laboratory of the Ministry of Education,*

*School of Electronic Science and Engineering, Faculty of Electronic and Information*

*Engineering, Xi'an Jiaotong University, Xi'an, 710049, China. E-mail: [ljin@mail.xjtu.edu.cn](mailto:ljin@mail.xjtu.edu.cn)*

<sup>b</sup>*Institute of Technical Acoustics, National Academy of Sciences of Belarus, Vitebsk, 210009,*

*Belarus*

<sup>c</sup>*School of Natural Sciences and Mathematics, Ural Federal University, Ekaterinburg,*

*620000, Russia*

## 1. Material and methods

High-entropy  $(1-x)(\text{Bi}_{0.375}\text{Na}_{0.3}\text{Sr}_{0.25}\text{K}_{0.075})\text{TiO}_3-x\text{Bi}(\text{Mg}_{0.5}\text{Sn}_{0.5})\text{O}_3$  ceramics (abbreviated as BNT-H100 $x$ ) with  $x = 0.05, 0.10, 0.15,$  and  $0.20$  were synthesized through solid-reaction method with original materials including  $\text{Bi}_2\text{O}_3$  (>99%),  $\text{Na}_2\text{CO}_3$  (>99.8%),  $\text{K}_2\text{CO}_3$  (>99%),  $\text{TiO}_2$  (>98%),  $\text{SrCO}_3$  (>99%),  $\text{SnO}_2$  (>99.5%), and  $\text{MgO}$  (>98.5%) powders. The raw materials were dried at 110 °C for 12 h and then they were mixed by ball-milling in ethanol for 4 h. The mixed materials were then calcined at 880 °C for 2 h before they were ball-milled again for another 4 h. Powders obtained after drying were pressed into discs with a diameter of 9 mm and a thickness of 1 mm by isostatic pressure. These discs were sintered at 1180 °C for 120 min with a heating rate of 3 °C/min. For the VPP treatment, all powders were ball-milled again with 5% PVA solution to create a viscous substance. Then it was rolled into 0.6 mm thick flakes and cut into discs with a diameter of 10 mm. These discs produced by VPP was sintered at 1130 °C for 90 mins.

X-ray diffractometer (XRD; Panalytical, Cambridge, UK) was used to investigate phase structures of the samples. Sintered bulk ceramics were grinded into powders and then annealed at 500 °C for 4 h to relieve the internal stress. The TEM testing sample was fabricated by focused ion beam milling (FIB, Helios G4 CX, FEI, USA). A scanning electron microscope (SEM; quanta, FEG 250, FEI, Hillsboro, USA) was used to observe fresh surface of the sintered ceramics. The dark field images, the selected area electron diffraction (SAED) pattern, and high-resolution transmission electron microscope images were obtained by the spherical aberration corrected transmission electron microscope (AC-TEM, Titan Cubed Themis G2300, FEI, USA). The dielectric properties of ceramics were tested using a multi-frequency LCR

meter (E4980AL, Keysight, USA). The test temperature was 30–450 °C and heat up at a rate of 3 °C/min. The test frequencies were 0.3, 1, 10, 100, and 1000 kHz. A ferroelectric instrument (TF analyzer 2000E, aixACCT, Aachen, Germany) was used to measure the hysteresis loops and current curves. The test samples were grinded to 2 mm thick and then coated with gold electrode on both sides. The pulsed behavior was collected through a charge-discharge instrument (CFD-003, Gogo Instruments Technology, China).

## Figures

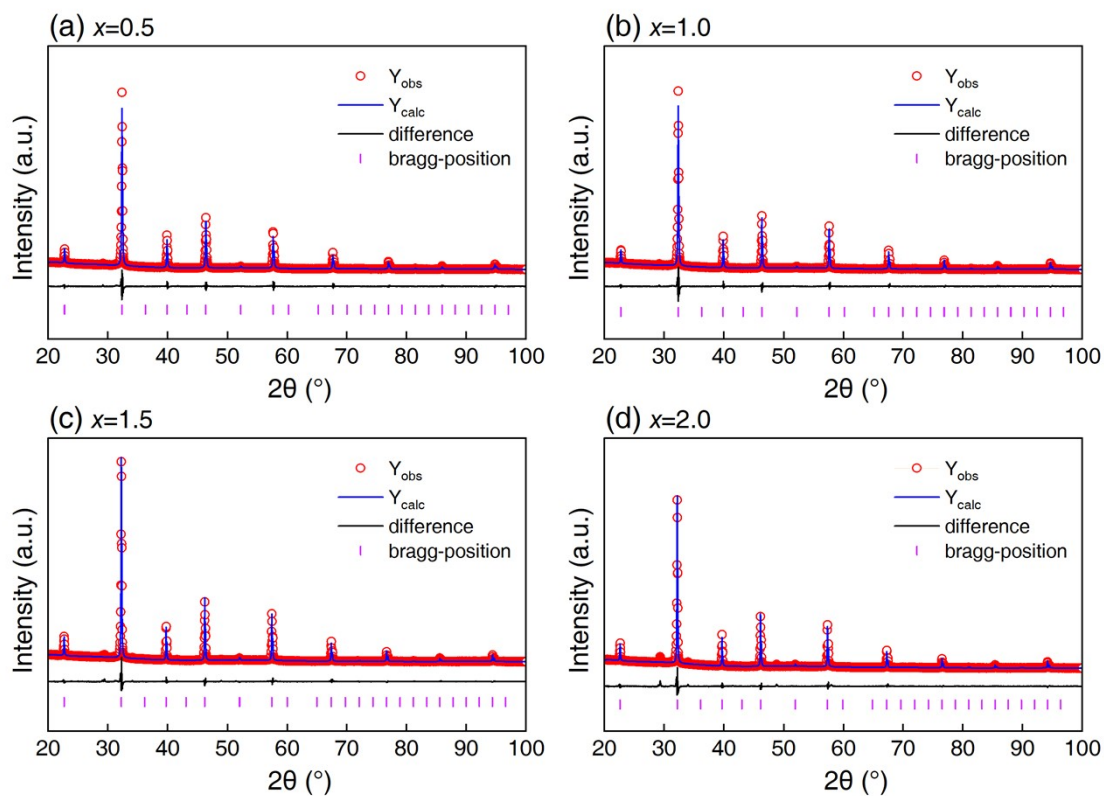

**Fig. S1.** Results of structure refinement for BNT-H100 $x$  ceramics. (a)  $x = 0.05$ , (b)  $x = 0.10$ , (c)  $x = 0.15$ , and (d)  $x = 0.20$ .

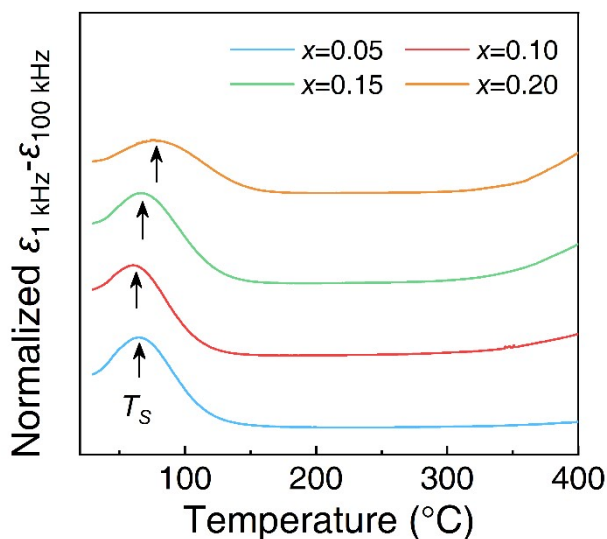

**Fig. S2.** Normalized  $\varepsilon_{1 \text{ kHz}} - \varepsilon_{100 \text{ kHz}}$  as a function of temperature from RT to 400 °C. Here  $\varepsilon_{1 \text{ kHz}}$  and  $\varepsilon_{100 \text{ kHz}}$  were the  $\varepsilon_r$  measured at 1 kHz and 100 kHz, respectively. The characteristic temperature ( $T_s$ ) is indicated by the vertical arrow.

**Table S1**Atomic configurational entropy  $S_{\text{config}}$  of BNT-H100 $x$  ceramics.

| $x$                 | 0.05          | 0.10          | 0.15          | 0.20          |
|---------------------|---------------|---------------|---------------|---------------|
| $S_{\text{config}}$ | 1.49 <i>R</i> | 1.63 <i>R</i> | 1.73 <i>R</i> | 1.82 <i>R</i> |

**Table S2**Rietveld crystal refinement parameters of BNT-H100 $x$  ceramics.

| Chemical formula             |          | $x = 0.5$   | $x = 1.0$   | $x = 1.5$   | $x = 2.0$   |
|------------------------------|----------|-------------|-------------|-------------|-------------|
| Space group                  |          | <i>P4bm</i> | <i>P4bm</i> | <i>P4bm</i> | <i>P4bm</i> |
| Cell parameter (Å)           | <i>a</i> | 5.5456(9)   | 5.5494(3)   | 5.5595(6)   | 5.5672(9)   |
|                              | <i>c</i> | 3.9208(7)   | 3.9234(4)   | 3.9308(2)   | 3.9365(4)   |
| Density (g/cm <sup>3</sup> ) |          | 5.842(1)    | 6.002(3)    | 6.133(1)    | 6.273(9)    |
| Volume (Å <sup>3</sup> )     |          | 120.585     | 120.827     | 121.496     | 6.246       |
| R-factors                    | $R_{wp}$ | 5.813       | 6.038       | 5.762       | 5.71        |
|                              | $\chi^2$ | 2.64        | 2.68        | 2.63        | 2.84        |
| No. of profile points        |          | 6005        | 6005        | 6005        | 6005        |

**Table S3**

Comparison of ESP between various representative lead-free systems.

| Composition                                                                                                                                                                               | $E$<br>(kV/cm) | $W_{\text{rec}}$<br>(J/cm <sup>3</sup> ) | $\eta$ (%) | Ref. |
|-------------------------------------------------------------------------------------------------------------------------------------------------------------------------------------------|----------------|------------------------------------------|------------|------|
| 0.7374Na <sub>0.5</sub> Bi <sub>0.5</sub> TiO <sub>3</sub> -0.2625BaSnO <sub>3</sub>                                                                                                      | 200            | 1.99                                     | 8.6        | 1    |
| 0.94(0.65Bi <sub>0.5</sub> Na <sub>0.5</sub> TiO <sub>3</sub> -0.35Bi <sub>0.1</sub> Sr <sub>0.85</sub> TiO <sub>3</sub> )-<br>0.06(K <sub>0.5</sub> Na <sub>0.5</sub> NbO <sub>3</sub> ) | 180            | 2.65                                     | 84.6       | 2    |
| 0.55BNT-0.45(Bi <sub>0.2</sub> Sr <sub>0.7</sub> TiO <sub>3</sub> )                                                                                                                       | 200            | 2.5                                      | 95         | 3    |
| 0.96(0.65BNT-0.35Sr <sub>0.85</sub> Bi <sub>0.1</sub> TiO <sub>3</sub> )-0.04NaNbO <sub>3</sub>                                                                                           | 220            | 3.08                                     | 81.4       | 4    |
| 0.5BNT-0.5SrTiO <sub>3</sub> -1.5 mol% CuO                                                                                                                                                | 230            | 2.2                                      | 72.39      | 5    |
| 0.9(0.7BNT-0.3SrTiO <sub>3</sub> )-0.1Bi(Nb <sub>0.5</sub> Mg <sub>0.5</sub> )O <sub>3</sub>                                                                                              | 240            | 3.46                                     | 78         | 6    |
| 0.6BNT-0.4Sr <sub>0.7</sub> Sm <sub>0.2</sub> TiO <sub>3</sub>                                                                                                                            | 260            | 3.52                                     | 84.2       | 7    |
| 0.90(Na <sub>0.5</sub> Bi <sub>0.5</sub> ) <sub>0.7</sub> Sr <sub>0.3</sub> TiO <sub>3</sub> -0.10Bi(Ni <sub>0.5</sub> Sn <sub>0.5</sub> )O <sub>3</sub>                                  | 270            | 4.18                                     | 83.64      | 8    |
| 0.6(Bi <sub>0.51</sub> Na <sub>0.47</sub> )TiO <sub>3</sub> -0.4Ba(Zr <sub>0.3</sub> Ti <sub>0.7</sub> )O <sub>3</sub>                                                                    | 280            | 3.1                                      | 91         | 9    |
| 0.6(Ba <sub>0.7</sub> Sr <sub>0.3</sub> )(Zr <sub>0.2</sub> Ti <sub>0.8</sub> )O <sub>3</sub> -0.4(Na <sub>0.5</sub> Bi <sub>0.5</sub> )TiO <sub>3</sub>                                  | 289            | 3.72                                     | 94.3       | 10   |
| (Na <sub>0.25</sub> Bi <sub>0.25</sub> Sr <sub>0.5</sub> )(Ti <sub>0.8</sub> Sn <sub>0.2</sub> )O <sub>3</sub>                                                                            | 310            | 3.4                                      | 90         | 11   |
| 0.9(0.65 BNT-0.35Bi <sub>0.2</sub> Sr <sub>0.7</sub> TiO <sub>3</sub> )-0.1CaZrO <sub>3</sub>                                                                                             | 330            | 2.9                                      | 80         | 12   |
| 0.85(0.55BNT-0.45Sr <sub>0.7</sub> La <sub>0.2</sub> TiO <sub>3</sub> )-<br>0.15Bi(Mg <sub>2/3</sub> Nb <sub>1/3</sub> )O <sub>3</sub>                                                    | 338            | 3.88                                     | 85         | 13   |
| 0.65(0.84BNT-0.16K <sub>0.5</sub> Bi <sub>0.5</sub> TiO <sub>3</sub> )-0.35(Bi <sub>0.2</sub> Sr <sub>0.7</sub> TiO <sub>3</sub> )                                                        | 350            | 4.06                                     | 87.3       | 14   |
| 0.88BNT-0.12CaZr <sub>0.5</sub> Ti <sub>0.5</sub> O <sub>3</sub>                                                                                                                          | 378.3          | 4.77                                     | 69         | 15   |
| 0.8(0.65BNT-0.35Bi <sub>0.2</sub> Sr <sub>0.7</sub> TiO <sub>3</sub> )-0.2BaSnO <sub>3</sub>                                                                                              | 380            | 3.75                                     | 84.8       | 16   |
| 0.85(0.94BNT-0.06BaTiO <sub>3</sub> )-0.15BiMg <sub>2/3</sub> Nb <sub>1/3</sub> O <sub>3</sub>                                                                                            | 420            | 6.3                                      | 80         | 17   |
| (Na <sub>0.5</sub> Bi <sub>0.5</sub> ) <sub>0.7</sub> Sr <sub>0.3</sub> TiO <sub>3</sub> -Ba(Mg <sub>1/3</sub> Nb <sub>2/3</sub> )O <sub>3</sub>                                          | 460            | 5.5                                      | 90.1       | 18   |
| 0.90(Bi <sub>0.5</sub> Na <sub>0.5</sub> ) <sub>0.65</sub> Sr <sub>0.35</sub> TiO <sub>3</sub> -0.10Bi(Mg <sub>0.5</sub> Zr <sub>0.5</sub> )O <sub>3</sub>                                | 522            | 8.46                                     | 85.9       | 19   |
| 0.75Bi <sub>0.58</sub> Na <sub>0.42</sub> TiO <sub>3</sub> -0.25SrTiO <sub>3</sub>                                                                                                        | 535            | 5.63                                     | 94         | 20   |
| 0.7(0.85BNT-0.15NaNbO <sub>3</sub> )-0.3(Sr <sub>1.05</sub> Bi <sub>0.3</sub> )ScO <sub>3</sub>                                                                                           | 540            | 7.3                                      | 80         | 21   |
| BSZT-BMN                                                                                                                                                                                  | 552            | 5.92                                     | 81.7       | 22   |
| (Bi <sub>0.5</sub> (Na <sub>0.8</sub> K <sub>0.2</sub> ) <sub>0.5</sub> ) <sub>0.96</sub> Sr <sub>0.04</sub> Ti <sub>0.99</sub> Ta <sub>0.01</sub> O <sub>3</sub> -0.70BNT-               | 572            | 6.78                                     | 89.7       | 23   |

|                                                                                                                                                      |     |       |      |    |
|------------------------------------------------------------------------------------------------------------------------------------------------------|-----|-------|------|----|
| $0.30\text{SrNb}_{0.5}\text{Al}_{0.5}\text{O}_3$                                                                                                     |     |       |      |    |
| $0.96(0.8\text{NaNbO}_3-0.2\text{SrTiO}_3)-0.04\text{Bi}(\text{Zn}_{0.5}\text{Sn}_{0.5})\text{O}_3$                                                  | 570 | 5.82  | 92.3 | 24 |
| $0.78\text{NaNbO}_3-0.22\text{Bi}(\text{Mg}_{2/3}\text{Ta}_{1/3})\text{O}_3$                                                                         | 620 | 5.01  | 86.8 | 25 |
| $\text{Bi}_{1.5}\text{Zn}_{0.75}\text{Mg}_{0.25}\text{Nb}_{0.75}\text{Ta}_{0.75}\text{O}_7$                                                          | 650 | 2.72  | 91   | 26 |
| $(\text{Ag}_{0.80}\text{Bi}_{0.04}\text{Sr}_{0.04})\text{NbO}_3$                                                                                     | 720 | 7.9   | 75.5 | 27 |
| $0.85(\text{Ba}_{0.8}\text{Sr}_{0.2})\text{TiO}_3-0.15\text{Bi}(\text{Mg}_{0.5}\text{Zr}_{0.5})\text{O}_3$                                           | 720 | 10.3  | 88   | 28 |
| $(\text{Na}_{0.91}\text{Bi}_{0.09})(\text{Nb}_{0.94}\text{Mg}_{0.06})\text{O}_3$                                                                     | 783 | 10.9  | 83   | 29 |
| $0.75[0.9\text{NN}-0.1\text{Bi}(\text{Mg}_{0.5}\text{Ta}_{0.5})\text{O}_3]-$<br>$0.25(\text{Bi}_{0.5}\text{Na}_{0.5})0.7\text{Sr}_{0.3}\text{TiO}_3$ | 800 | 8     | 90.4 | 30 |
| $0.85\text{K}_{0.5}\text{Na}_{0.5}\text{NbO}_3-0.15\text{SrTiO}_3$                                                                                   | 400 | 4.03  | 52   | 31 |
| $0.8\text{K}_{0.5}\text{Na}_{0.5}\text{NbO}_3-0.2\text{SrTiO}_3$                                                                                     | 400 | 3.67  | 72.1 |    |
| $0.92\text{NaNbO}_3-0.08\text{Bi}(\text{Mg}_{0.5}\text{Ti}_{0.5})\text{O}_3$                                                                         | 480 | 5.57  | 71   | 32 |
| $\text{BaTiO}_3-0.06\text{Bi}_{2/3}(\text{Mg}_{1/3}\text{Nb}_{2/3})\text{O}_3$                                                                       | 520 | 4.55  | 91   | 33 |
| This work                                                                                                                                            | 610 | 11.29 | 90   |    |

---



## References

1. L. Zhang, Y. Pu, M. Chen, R. Li, X. Guo and Y. Cui, *Ceramics International*, 2018, **44**, S207-S210.
2. Z. Pan, D. Hu, Y. Zhang, J. Liu, B. Shen and J. Zhai, *Journal of Materials Chemistry C*, 2019, **7**, 4072-4078.
3. J. Li, F. Li, Z. Xu and S. Zhang, *Advanced Materials*, 2018, **30**, 1802155.
4. Y. Wu, Y. Fan, N. Liu, P. Peng, M. Zhou, S. Yan, F. Cao, X. Dong and G. Wang, *Journal of Materials Chemistry C*, 2019, **7**, 6222-6230.
5. F. Zhang, X. Qiao, Q. Shi, X. Chao, Z. Yang and D. Wu, *Journal of the European Ceramic Society*, 2021, **41**, 368-375.
6. Y. Ding, J. Liu, C. Li, W. Bai, S. Wu, P. Zheng, J. Zhang and J. Zhai, *Chemical Engineering Journal*, 2021, **426**, 130811.
7. X. Qiao, A. Sheng, D. Wu, F. Zhang, B. Chen, P. Liang, J. Wang, X. Chao and Z. Yang, *Chemical Engineering Journal*, 2021, **408**, 127368.
8. D. Li, Y. Lin, Q. Yuan, M. Zhang, L. Ma and H. Yang, *Journal of Materiomics*, 2020, **6**, 743-750.
9. Y. Huang, F. Li, H. Hao, F. Xia, H. Liu and S. Zhang, *Journal of Materiomics*, 2019, **5**, 385-393.
10. Y. Wang, T. Wang, J. Wang, J. Liu, Z. Xing, H. Yang, L. Kong, Y. Cheng, G. Chen, F. Wang and C. Li, *Journal of the European Ceramic Society*, 2021, **41**, 6474-6481.
11. L. Yang, X. Kong, Z. Cheng and S. Zhang, *Journal of Materials Chemistry A*, 2019, **7**, 8573-8580.
12. X. Guo, P. Shi, X. Lou, Q. Liu and H. Zuo, *Journal of Alloys and Compounds*, 2021, **876**, 160101.
13. J. Zhu, Z. Ma, Q. Su, X. Meng, Y. Zhao, Y. Li and X. Hao, *Journal of Materials Science: Materials in Electronics*, 2021, **32**, 26258-26267.
14. D. Hu, Z. Pan, X. Zhang, H. Ye, Z. He, M. Wang, S. Xing, J. Zhai, Q. Fu and J. Liu, *Journal of Materials Chemistry C*, 2020, **8**, 591-601.
15. S. Bian, Z. Yue, Y. Shi, J. Zhang and W. Feng, *Journal of the American Ceramic Society*, 2021, **104**, 936-947.
16. P. Shi, X. Zhu, X. Lou, B. Yang, X. Guo, L. He, Q. Liu, S. Yang and X. Zhang, *Composites Part B: Engineering*, 2021, **215**, 108815.
17. B. Guo, Y. Yan, M. Tang, Z. Wang, Y. Li, L. Zhang, H. Zhang, L. Jin and G. Liu, *Chemical Engineering Journal*, 2021, **420**, 130475.
18. X. Li, Y. Cheng, F. Wang, Q. Xu, Y. Chen, L. Xie, Z. Tan, J. Xing and J. Zhu, *Chemical*

- Engineering Journal*, 2022, **431**, 133441.
19. X. P. Zhu, Y. F. Gao, P. Shi, R. R. Kang, F. Kang, W. J. Qiao, J. Y. Zhao, Z. Wang, Y. Yuan and X. J. Lou, *Nano Energy*, 2022, **98**.
  20. F. Yan, K. Huang, T. Jiang, X. Zhou, Y. Shi, G. Ge, B. Shen and J. Zhai, *Energy Storage Materials*, 2020, **30**, 392-400.
  21. C. Zhang, W. Xiao, F. Zeng, D. Su, K. Du, S. Qiu, G. Fan, W. Lei, H. Zhang, S. Jiang, J.-M. Wu and G. Zhang, *Journal of Materials Chemistry A*, 2021, **9**, 10088-10094.
  22. W. Huang, Y. Chen, X. Li, G. Wang, J. Xia and X. Dong, *Chemical Engineering Journal*, 2022, **444**, 135523.
  23. F. Yan, H. Bai, X. Zhou, G. Ge, G. Li, B. Shen and J. Zhai, *Journal of Materials Chemistry A*, 2020, **8**, 11656-11664.
  24. R. Kang, Z. Wang, W. Yang, X. Zhu, P. Shi, Y. Gao, P. Mao, J. Zhao, L. Zhang and X. Lou, *Journal of Materials Chemistry A*, 2021, **9**, 24387-24396.
  25. J. Shi, X. Chen, X. Li, J. Sun, C. Sun, F. Pang and H. Zhou, *Journal of Materials Chemistry C*, 2020, **8**, 3784-3794.
  26. Y. Chen, J. Qi, M. Zhang, Z. Luo and Y.-H. Lin, *Journal of Advanced Ceramics*, 2022, **11**, 1179-1185.
  27. H. Yuan, X. H. Fan, Z. H. Zheng, M. Y. Zhao, L. Zhao, K. J. Zhu and J. Wang, *Chemical Engineering Journal*, 2023, **456**.
  28. W. Wang, L. Y. Zhang, C. Li, D. O. Alikin, V. Y. Shur, X. Y. Wei, F. Gao, H. L. Du and L. Jin, *Chemical Engineering Journal*, 2022, **446**.
  29. J. Jiang, X. J. Meng, L. Li, J. Zhang, S. Guo, J. Wang, X. H. Hao, H. G. Zhu and S. T. Zhang, *Chemical Engineering Journal*, 2021, **422**.
  30. H. Chen, J. Shi, X. Chen, C. Sun, F. Pang, X. Dong, H. Zhang and H. Zhou, *Journal of Materials Chemistry A*, 2021, **9**, 4789-4799.
  31. Z. Yang, H. Du, S. Qu, Y. Hou, H. Ma, J. Wang, J. Wang, X. Wei and Z. Xu, *Journal of Materials Chemistry A*, 2016, **4**, 13778-13785.
  32. A. Tian, R. Zuo, H. Qi and M. Shi, *Journal of Materials Chemistry A*, 2020, **8**, 8352-8359.
  33. H. Yang, Z. Lu, L. Li, W. Bao, H. Ji, J. Li, A. Feteira, F. Xu, Y. Zhang, H. Sun, Z. Huang, W. Lou, K. Song, S. Sun, G. Wang, D. Wang and I. M. Reaney, *ACS Applied Materials & Interfaces*, 2020, **12**, 43942-43949.
